# Supplementary material
Source: PubMed Central journal article supplement (PMC11115632)

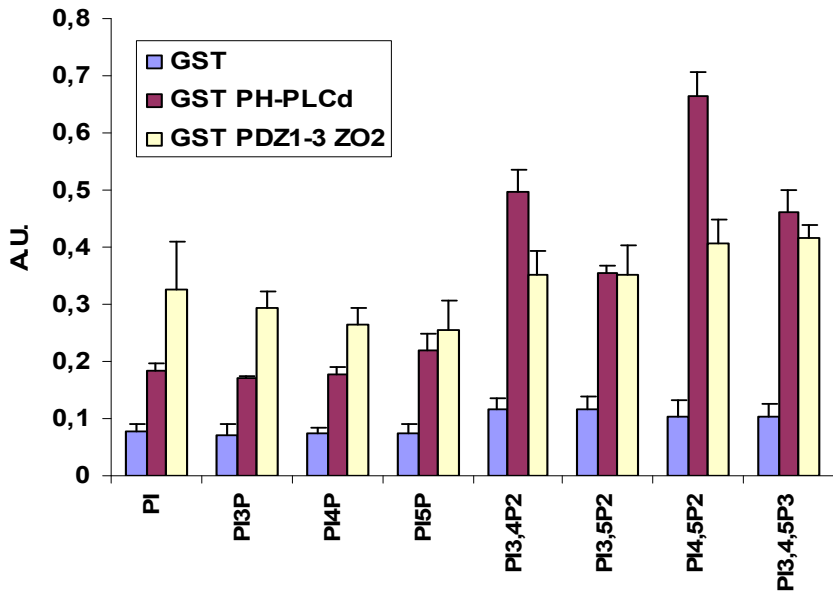

***Meerschaert et al., supplementary Figure S1***

Supplement: 18_2009_156_MOESM1_ESM.pdf [file 18_2009_156_MOESM1_ESM.pdf]

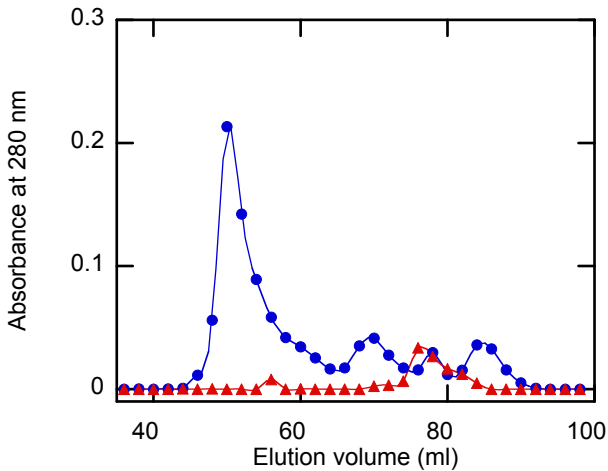

***Meerschaert et al., supplementary Figure S2***

Supplement: 18_2009_156_MOESM2_ESM.pdf [file 18_2009_156_MOESM2_ESM.pdf]
